# Supplementary material
Source: publisher figshare collection journal article supplement (https://acs.figshare.com/ndownloader/files/7402276)
Supplement: Supplementary file 1 [file 7402276]

45
Organoferrate Doublet, OPBE/def2-TZVPP EE= -2190.621975
Fe      0.47529     -0.44067      0.69750
C      -1.53585     -1.12844      0.65045
C      -0.61502     -2.14572      0.25016
H      -0.73181     -2.63451     -0.71521
C       0.49198     -2.49666      1.05807
H       1.21811     -3.21397      0.67825
C       0.77243     -1.78034      2.24860
H       1.67163     -1.99639      2.82490
C      -0.12264     -0.76493      2.66305
H       0.08336     -0.18240      3.56087
C      -1.26106     -0.45555      1.88101
H      -1.89012      0.37675      2.18832
C      -2.73698     -0.82166     -0.15386
C      -3.33785      0.45188     -0.15440
H      -2.88882      1.25874      0.41901
C      -4.47937      0.71489     -0.90423
H      -4.90909      1.71710     -0.88704
C      -5.06393     -0.28287     -1.68587
H      -5.95567     -0.07406     -2.27667
C      -4.48812     -1.55210     -1.69492
H      -4.93407     -2.35089     -2.28885
C      -3.34903     -1.81757     -0.93904
H      -2.94111     -2.82668     -0.93986
C       0.59364      1.51657      0.53869
C       1.16525      2.33647      1.53990
H       1.59055      1.87588      2.43476
C       1.22038      3.72949      1.44523
H       1.67510      4.30782      2.25359
C       0.70033      4.38540      0.32916
H       0.74024      5.47251      0.24902
C       0.13766      3.61220     -0.68830
H      -0.26909      4.09799     -1.57884
C       0.09637      2.22050     -0.58343
H      -0.34412      1.66743     -1.41515
C       2.07106     -0.53059     -0.43860
C       3.38498     -0.46179      0.08083
H       3.53464     -0.28826      1.14890
C       4.52451     -0.60287     -0.71405
H       5.51384     -0.54321     -0.25339
C       4.40982     -0.81396     -2.08897
H       5.29664     -0.92225     -2.71458
C       3.13035     -0.87325     -2.64342
H       3.01021     -1.03041     -3.71831
C       1.99807     -0.73243     -1.83660
H       1.02244     -0.78566     -2.32534

45
Organoferrate Quartet, OPBE/def2-TZVPP EE= -2190.590455
Fe      0.24052      0.62369     -1.21129
C       2.00878      3.14523      0.27682
C       2.97326      2.54847     -0.60490
H       4.02451      2.52881     -0.32195
C       2.60772      2.06614     -1.83887
H       3.37896      1.67073     -2.50289
C       1.24701      2.05462     -2.29087
H       1.05356      1.95849     -3.36051
C       0.26845      2.69791     -1.43107
H      -0.69046      3.02828     -1.83396
C       0.69588      3.22999     -0.18541
H      -0.06263      3.69046      0.44751
C       2.39817      3.63538      1.60658
C       1.71707      4.69039      2.25198
H       0.89422      5.18904      1.74232
C       2.08700      5.13431      3.51678
H       1.53533      5.95567      3.97616
C       3.16283      4.55314      4.19120
H       3.45450      4.90422      5.18076
C       3.85744      3.51497      3.57016
H       4.69607      3.03799      4.07934
C       3.48344      3.06602      2.30740
H       4.02741      2.23222      1.86686
C      -1.55305      0.44952     -0.29180
C      -2.78319      0.48953     -0.98767
H      -2.78522      0.65982     -2.06906
C      -4.02001      0.31483     -0.36440
H      -4.93930      0.35623     -0.95386
C      -4.08732      0.08384      1.01171
H      -5.04969     -0.05541      1.50607
C      -2.89927      0.03349      1.74105
H      -2.93033     -0.14596      2.81861
C      -1.67081      0.21558      1.09818
H      -0.76972      0.17534      1.71925
C       0.71879     -0.94659     -2.37988
C       0.18869     -1.15743     -3.67334
H      -0.47830     -0.40904     -4.11282
C       0.46906     -2.29175     -4.43709
H       0.02905     -2.40287     -5.43113
C       1.31225     -3.28696     -3.93632
H       1.53522     -4.17620     -4.52732
C       1.86331     -3.12017     -2.66568
H       2.52672     -3.88583     -2.25588
C       1.57143     -1.97607     -1.91677
H       2.03467     -1.89168     -0.92807
